# Supplementary material for: Histone Lysine Demethylase JMJD2D/KDM4D and Family Members Mediate Effects of Chronic Social Defeat Stress on Mouse Hippocampal Neurogenesis and Mood Disorders
Source: MDPI journal article supplement (doi:10.3390/brainsci10110833), 2020-11-09

## A. Experimental design for animal studies

0 hr. time point (tissue collection immediately after the last stress episode)

Male mice 6-8 weeks old

10 days social defeat

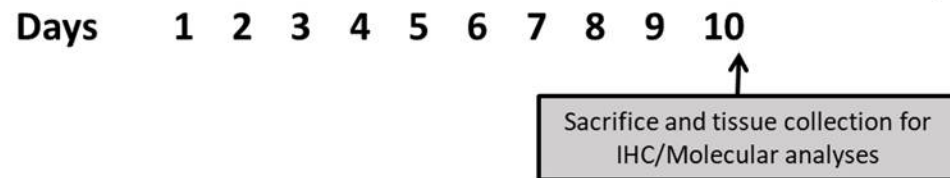

24 hr. time point (tissue collection 24hr after last stress episode)

Male mice 6-8 weeks old

10 days social defeat

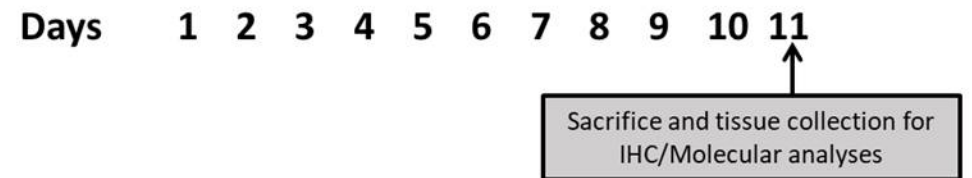

## B. Outline for the *ex-vivo* NSCs/NPCs culture experiments

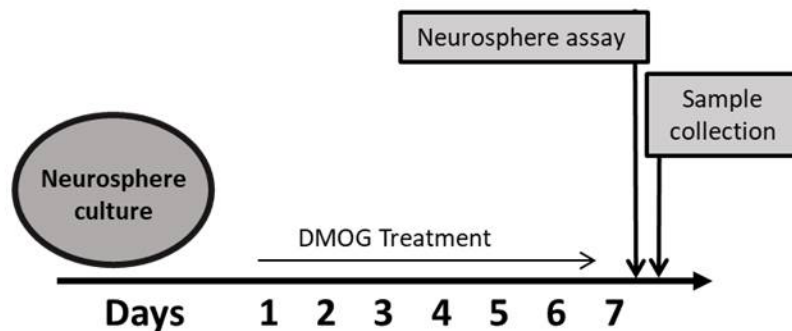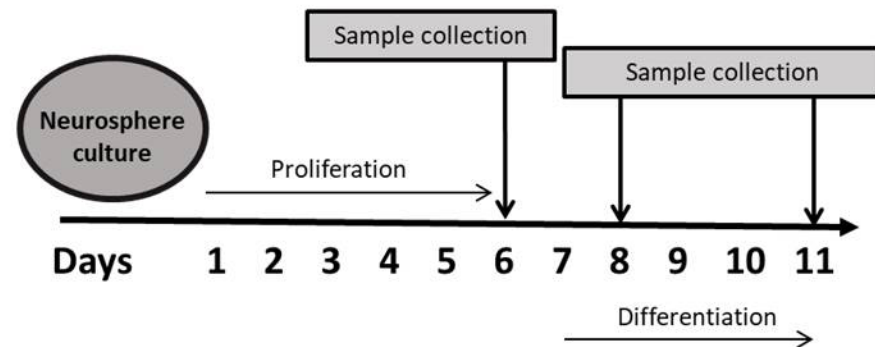

## C. *In vivo* DMOG administration

Male mice 6-8 weeks old

10 days of DMOG injection (40mg/kg)

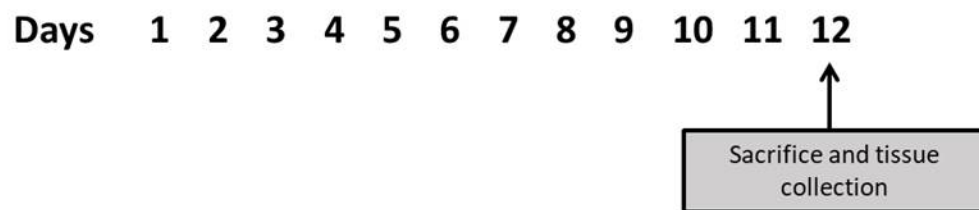

Supplement: s1 [file s1]
